# Supplementary material for: An adaptation of astronomical image processing enables characterization and functional 3D mapping of individual sites of excitation-contraction coupling in rat cardiac muscle
Source: eLife journal article supplement (doi:10.7554/elife.30425), 2017-11-14
Supplement: supp [file elife-30425-supp-v1.zip]

**A**

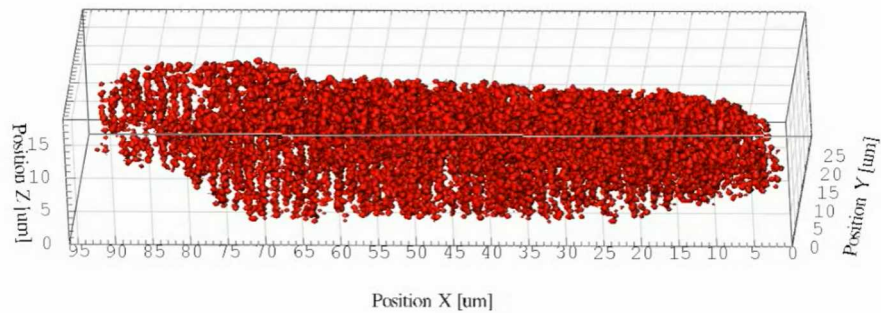

3-D SURFACE RENDERING OF COUPLON SITES

**B**

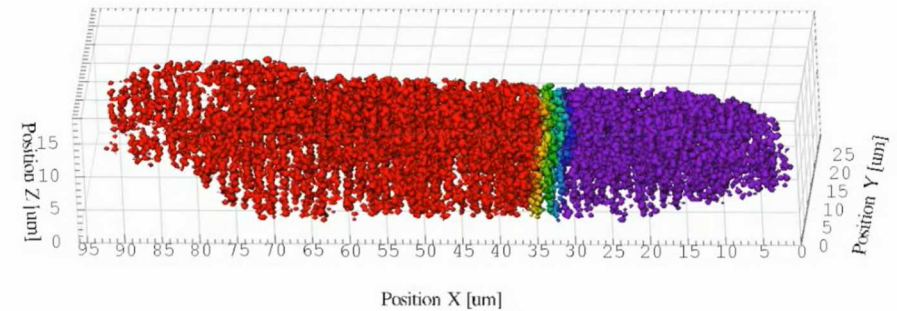

COUPLON SITES CODED BY AXIAL DISTANCE

**C**

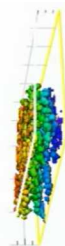

BOTH SIDES OF SURFACE ARE CUT OPEN...

**D**

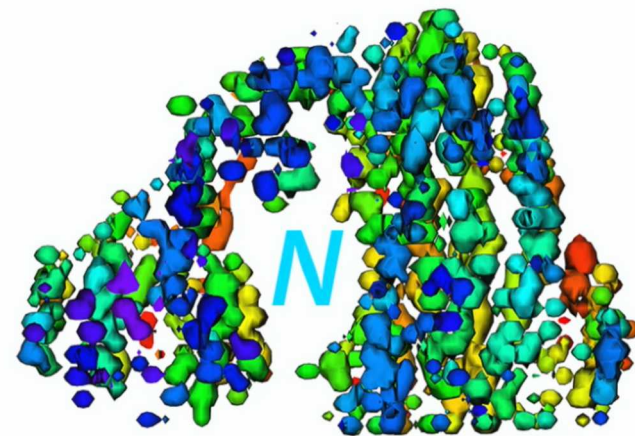

3 μm

32 μm

37 μm
