# Supplementary material for: An adaptation of astronomical image processing enables characterization and functional 3D mapping of individual sites of excitation-contraction coupling in rat cardiac muscle
Source: eLife journal article supplement (doi:10.7554/elife.30425), 2017-11-14
Supplement: supp [file elife-30425-supp-v1.zip]

Archive with 14 entries (14 files):
- elife_poa_e30425_Figure_4_figure_supplement_1.pdf
- elife_poa_e30425_Movie_1.mov
- elife_poa_e30425_Transparent_Reporting_File.docx
- elife_poa_e30425_Figure_2_figure_supplement_1.pdf
- elife_poa_e30425_Figure_1_figure_supplement_3.pdf
- elife_poa_e30425_Figure_1_figure_supplement_1.pdf
- elife_poa_e30425_Figure_3_figure_supplement_1.pdf
- elife_poa_e30425_Figure_1_figure_supplement_2.pdf
- elife_poa_e30425_Figure_1_figure_supplement_6.pdf
- elife_poa_e30425_Figure_1_figure_supplement_4.pdf
- elife_poa_e30425_Figure_3_figure_supplement_2.pdf
- elife_poa_e30425_Figure_3_source_data_1.xlsx
- elife_poa_e30425_Figure_1_figure_supplement_5.pdf
- elife_poa_e30425_Figure_1_figure_supplement_7.pdf
