# Supplementary material for: An adaptation of astronomical image processing enables characterization and functional 3D mapping of individual sites of excitation-contraction coupling in rat cardiac muscle
Source: eLife journal article supplement (doi:10.7554/elife.30425), 2017-11-14
Supplement: supp [file elife-30425-supp-v1.zip › elife_poa_e30425_Figure_3_source_data_1.xlsx]

## Sheet: Sheet1
	Figure 3Ca	Amplitude				Figure 3Cb	Couplon Density
	Ctrl	Iso 10 nM	P Value	P Value Summary		Ctrl	Iso 10 nM	P Value	P Value Summary
	600 ms	600 ms	<0.0001	****		600 ms	600 ms	<0.0001	****
	450 ms	450 ms	<0.0001	****		450 ms	450 ms	<0.0001	****
	300 ms	300 ms	<0.0001	****		300 ms	300 ms	<0.0001	****
	200 ms	200 ms	<0.0001	****		200 ms	200 ms	<0.0001	****
	150 ms	150 ms	<0.0001	****		150 ms	150 ms	0.0096	**
	100 ms	100 ms	0.0459	*		100 ms	100 ms	0.2481	ns
	Figure 3Cc	Couplon Amplitude				Figure 3Cd	Couplon FWHM
	Ctrl	Iso 10 nM	P Value	P Value Summary		Ctrl	Iso 10 nM	P Value	P Value Summary
	600 ms	600 ms	<0.0001	****		600 ms	600 ms	<0.0001	****
	450 ms	450 ms	<0.0001	****		450 ms	450 ms	<0.0001	****
	300 ms	300 ms	<0.0001	****		300 ms	300 ms	<0.0001	****
	200 ms	200 ms	<0.0001	****		200 ms	200 ms	<0.0001	****
	150 ms	150 ms	<0.0001	****		150 ms	150 ms	0.0005	***
	100 ms	100 ms	<0.0001	****		100 ms	100 ms	0.0145	*
	Figure 3Ce	Inter-CaT Couplon CV				Figure 3Cf	Intra-CaT Couplon CV
	Ctrl	Iso 10 nM	P Value	P Value Summary		Ctrl	Iso 10 nM	P Value	P Value Summary
	600 ms	600 ms	<0.0001	****		600 ms	600 ms	<0.0001	****
	450 ms	450 ms	<0.0001	****		450 ms	450 ms	<0.0001	****
	300 ms	300 ms	<0.0001	****		300 ms	300 ms	<0.0001	****
	200 ms	200 ms	<0.0001	****		200 ms	200 ms	<0.0001	****
	150 ms	150 ms	0.0033	**		150 ms	150 ms	0.6483	ns
	100 ms	100 ms	0.3657	ns		100 ms	100 ms	0.5521	ns
	Figure 3Db	FFT Power				Figure 3Dc	Perioodic Distances
	Ctrl	Iso 10 nM	P Value	P Value Summary		Ctrl	Iso 10 nM	P Value	P Value Summary
	600 ms	600 ms	0.7546	ns		600 ms	600 ms	0.9605	ns
	450 ms	450 ms	0.8374	ns		450 ms	450 ms	0.3606	ns
	300 ms	300 ms	0.2037	ns		300 ms	300 ms	0.2809	ns
	200 ms	200 ms	0.2218	ns		200 ms	200 ms	0.5928	ns
	150 ms	150 ms	0.2314	ns		150 ms	150 ms	0.8095	ns
	100 ms	100 ms	0.4126	ns		100 ms	100 ms	0.97	ns
