# Supplementary figures and images for: An adaptation of astronomical image processing enables characterization and functional 3D mapping of individual sites of excitation-contraction coupling in rat cardiac muscle
Source: eLife journal article supplement (doi:10.7554/elife.30425), 2017-11-14

**A** Components of local  $\text{Ca}^{2+}$  signal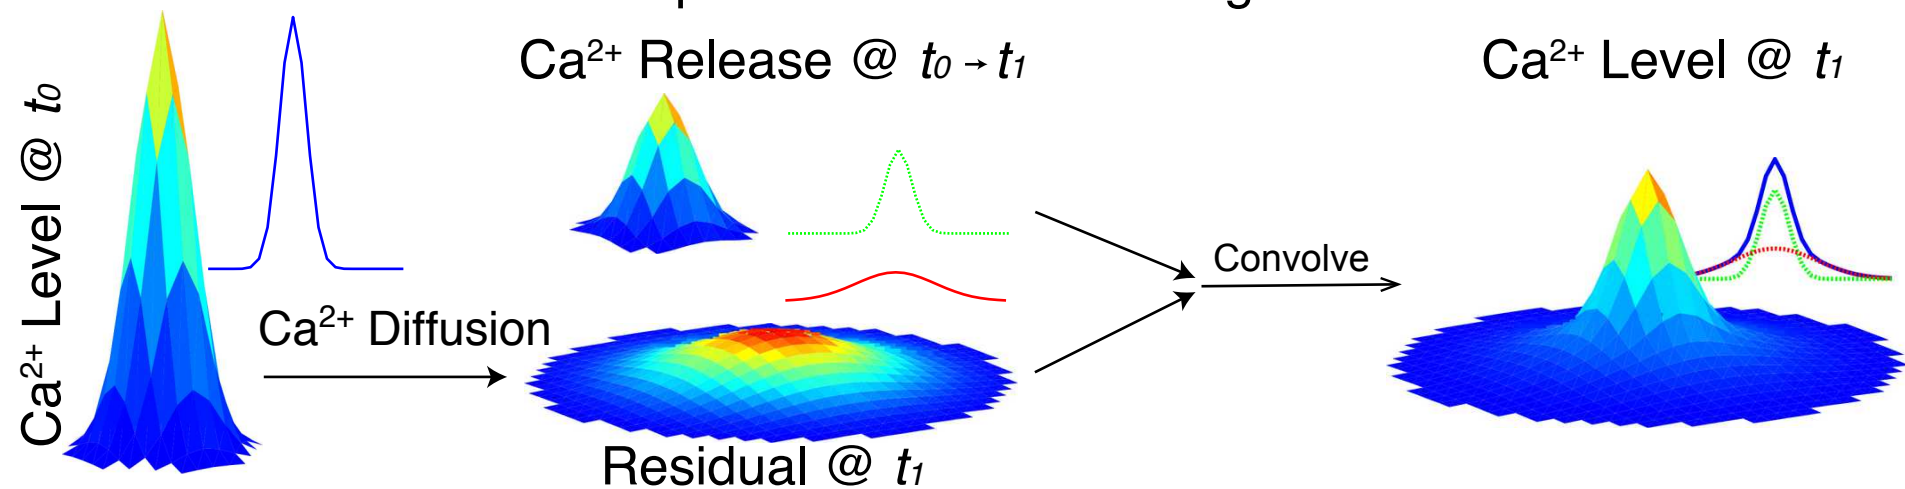**B** CaCLEAN Process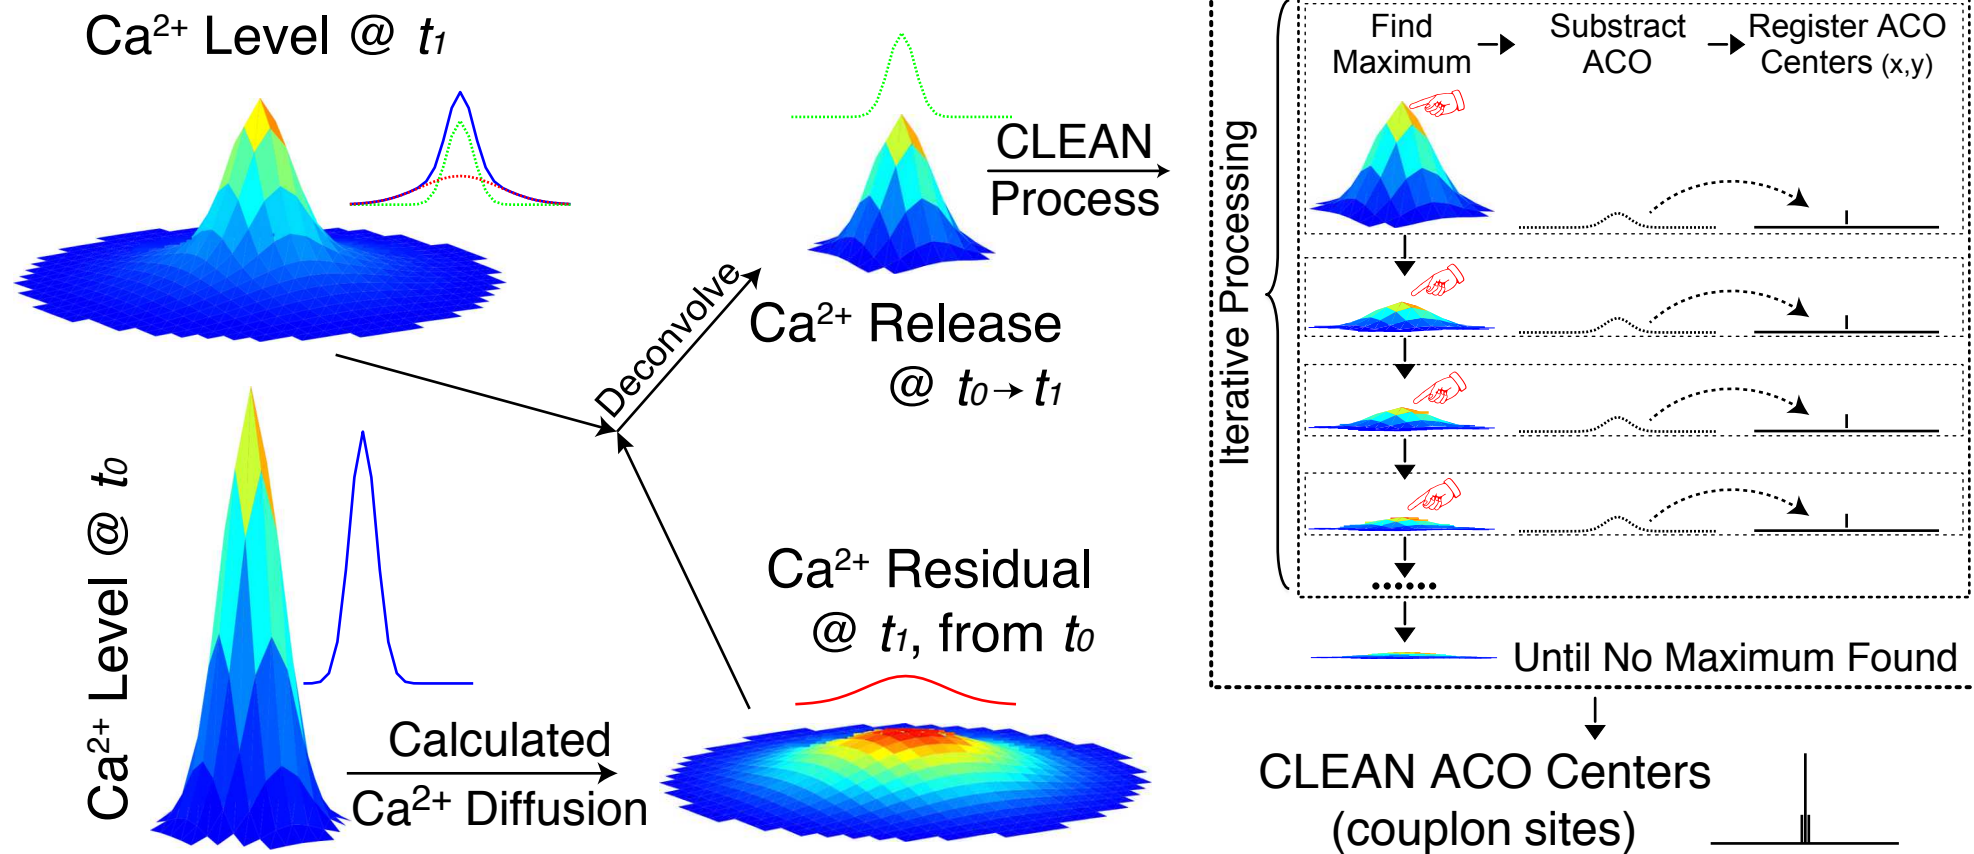

Supplement: supp [file elife-30425-supp-v1.zip]

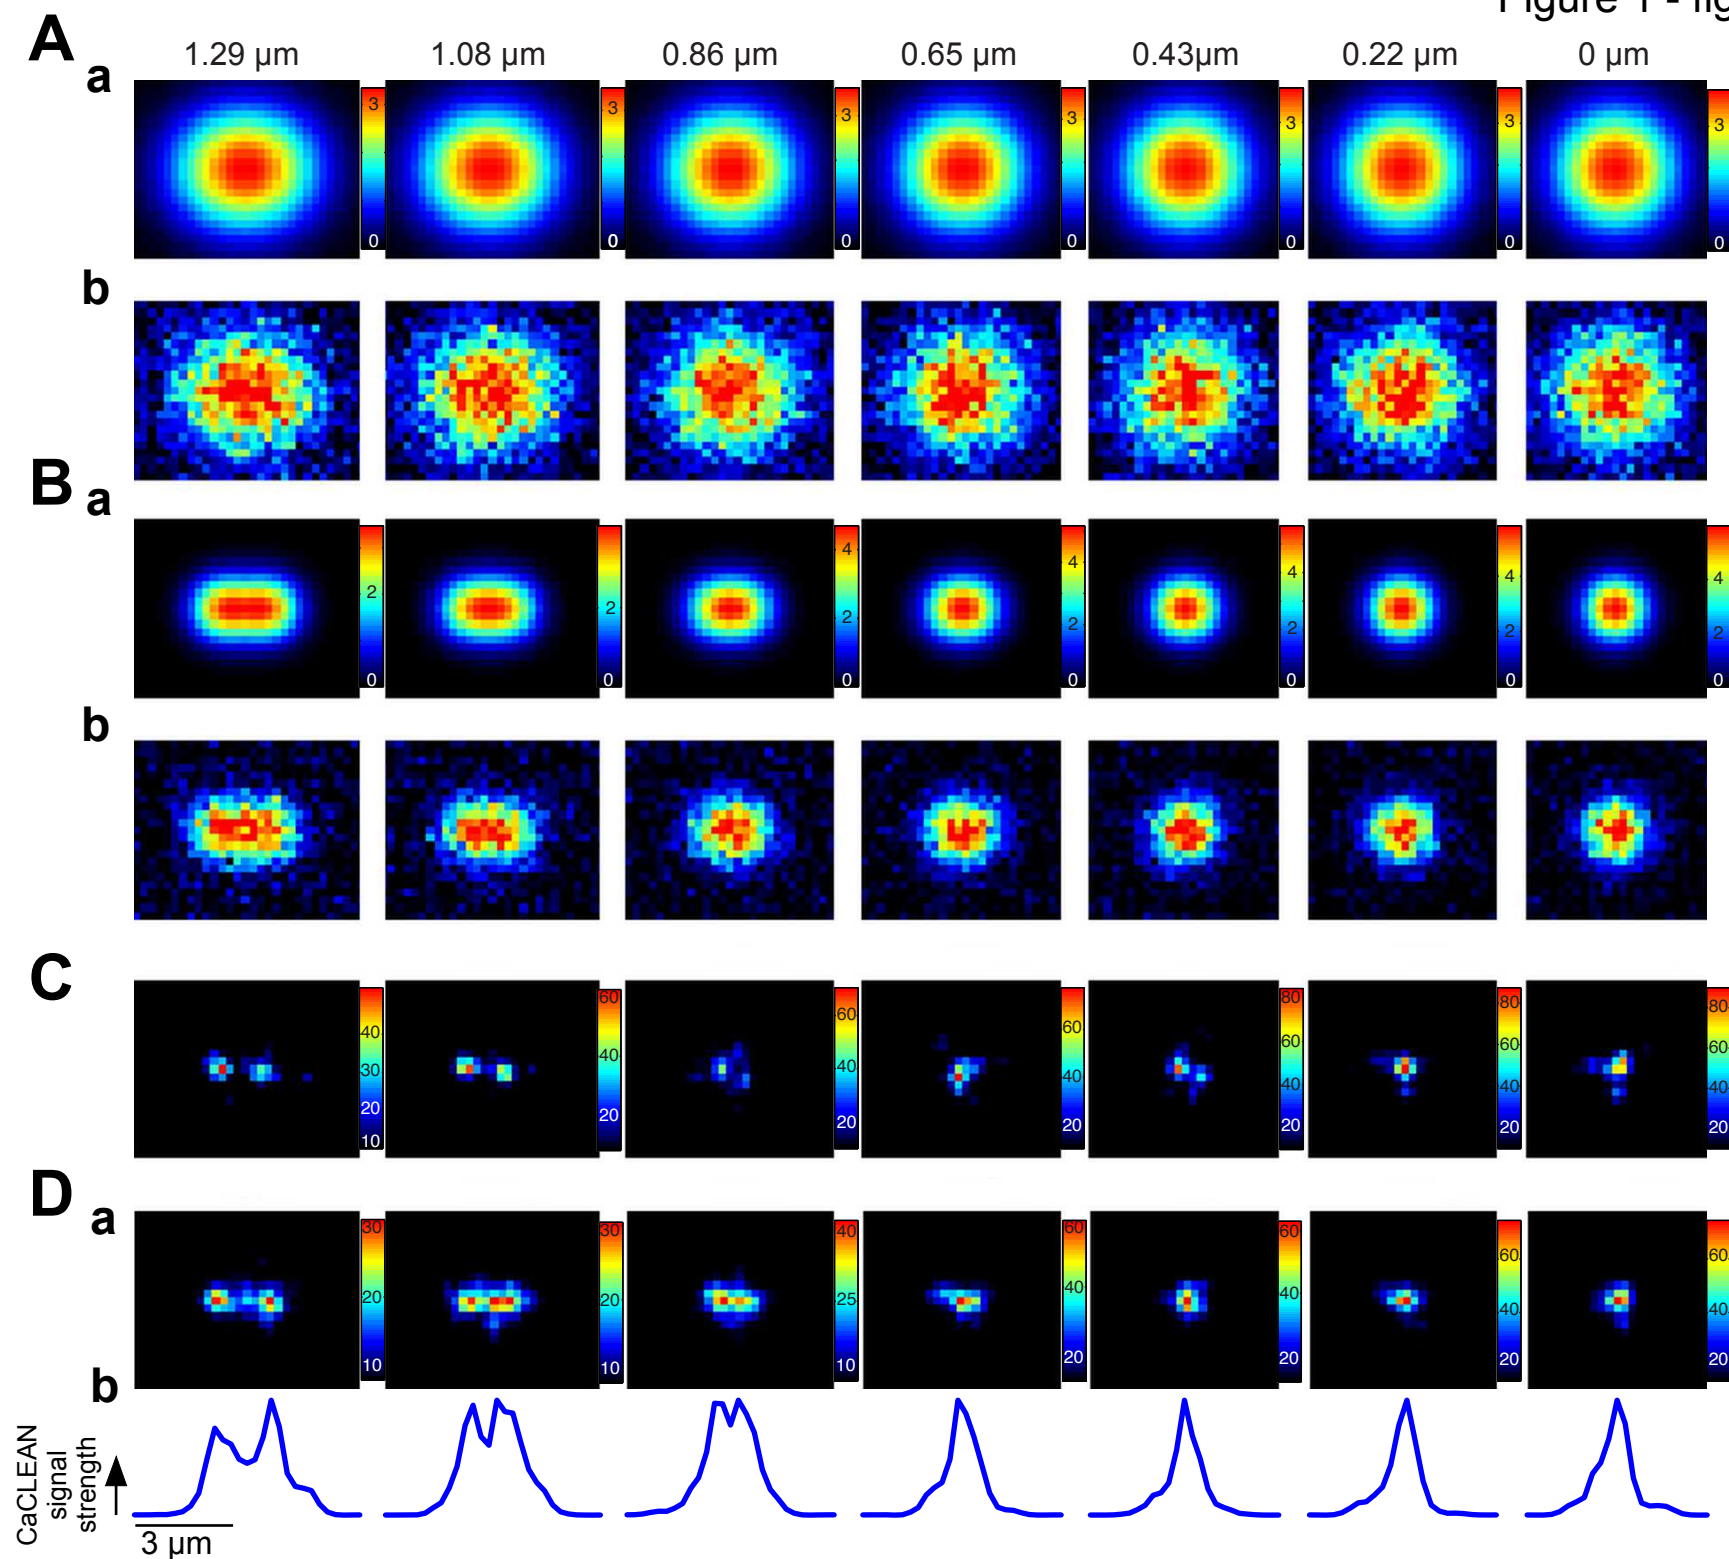

Supplement: supp [file elife-30425-supp-v1.zip]

**A**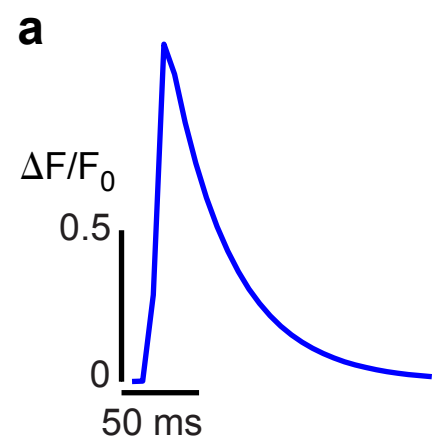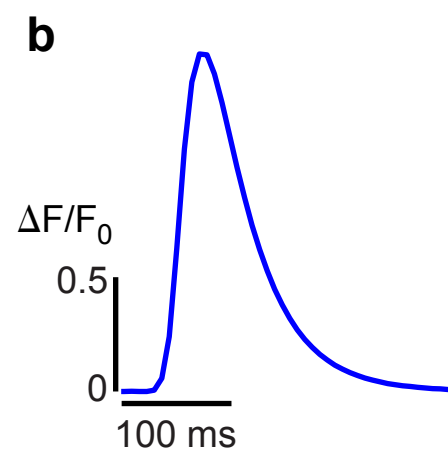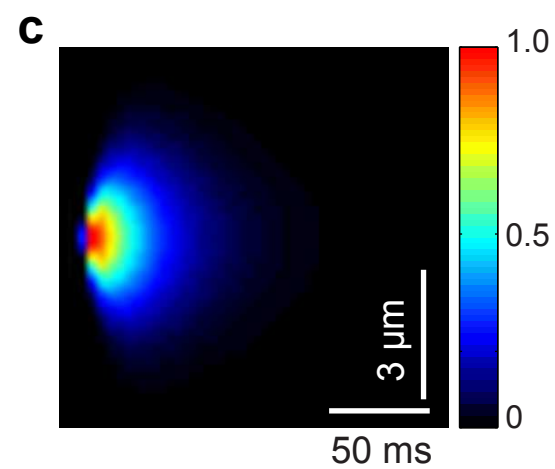**B**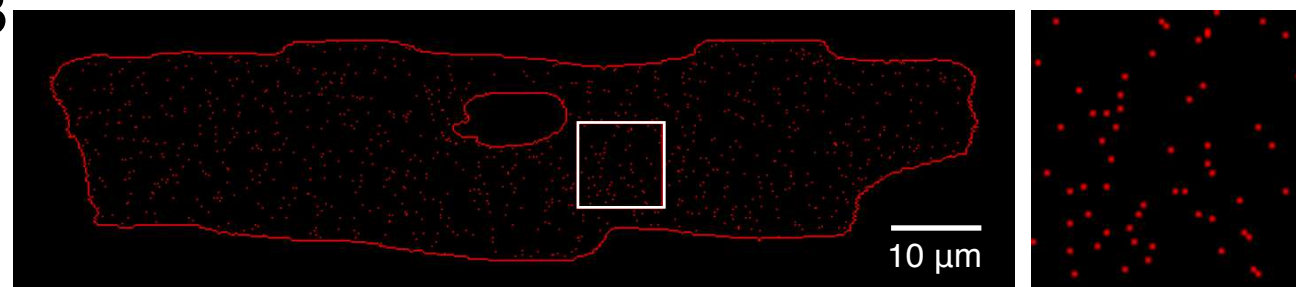**C**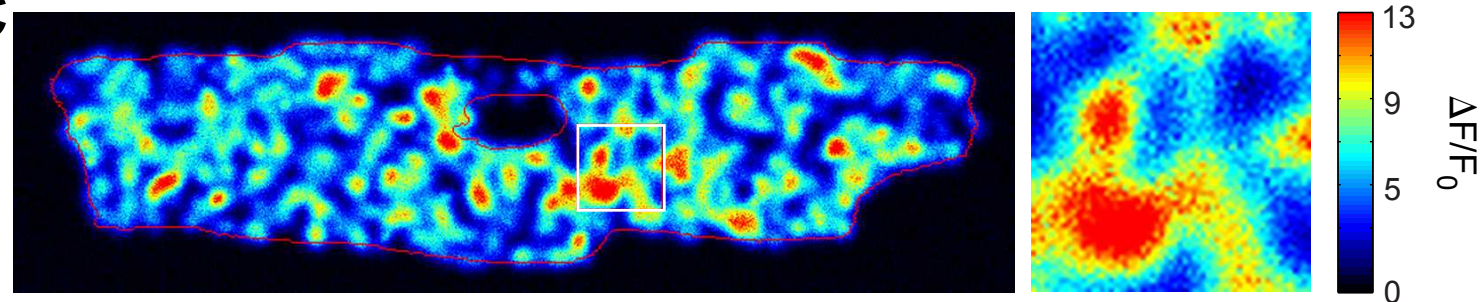**D**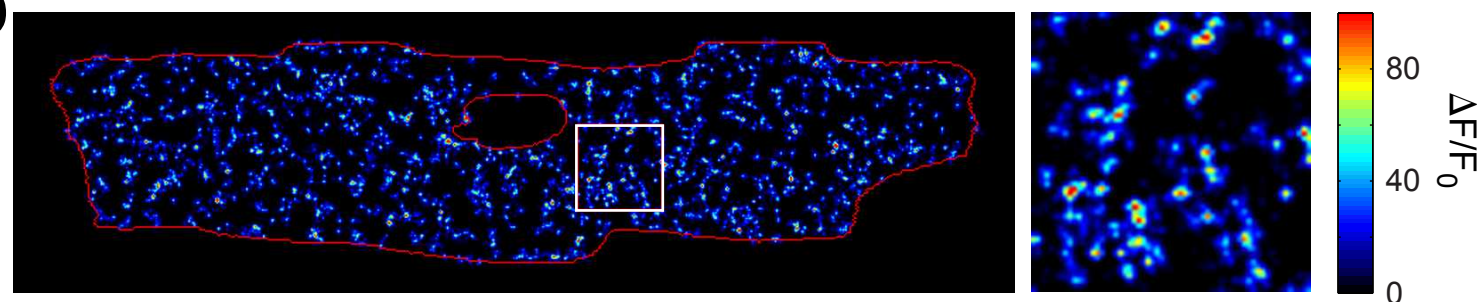**E**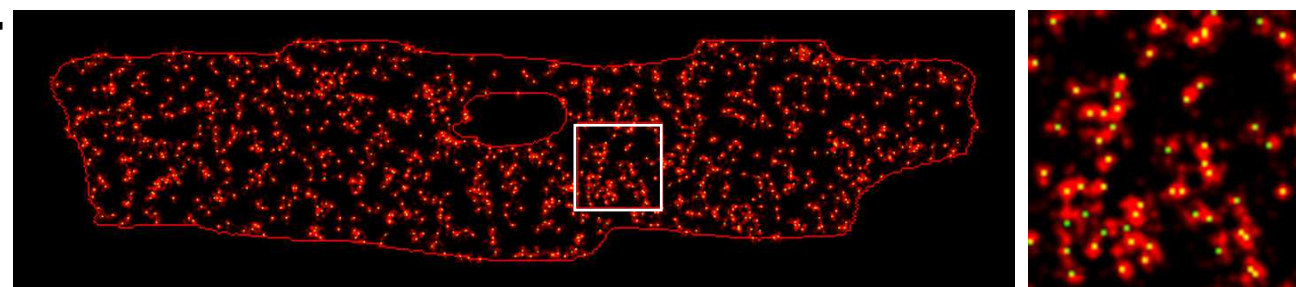

Supplement: supp [file elife-30425-supp-v1.zip]

**A**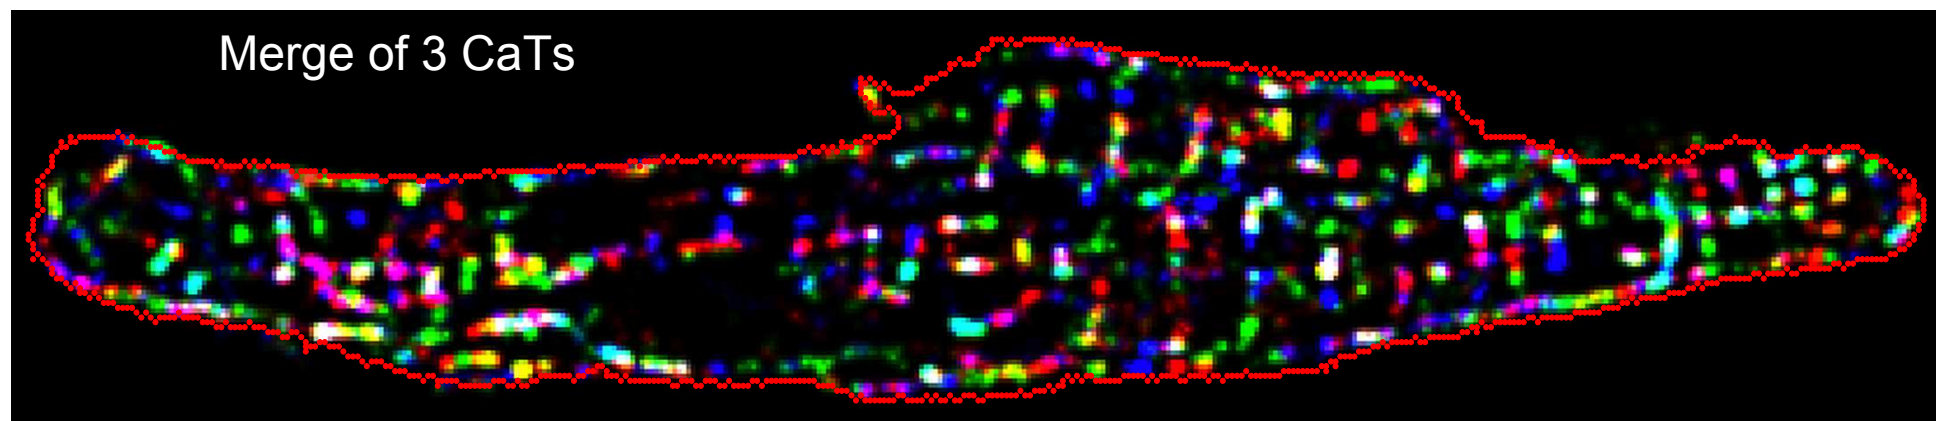**B**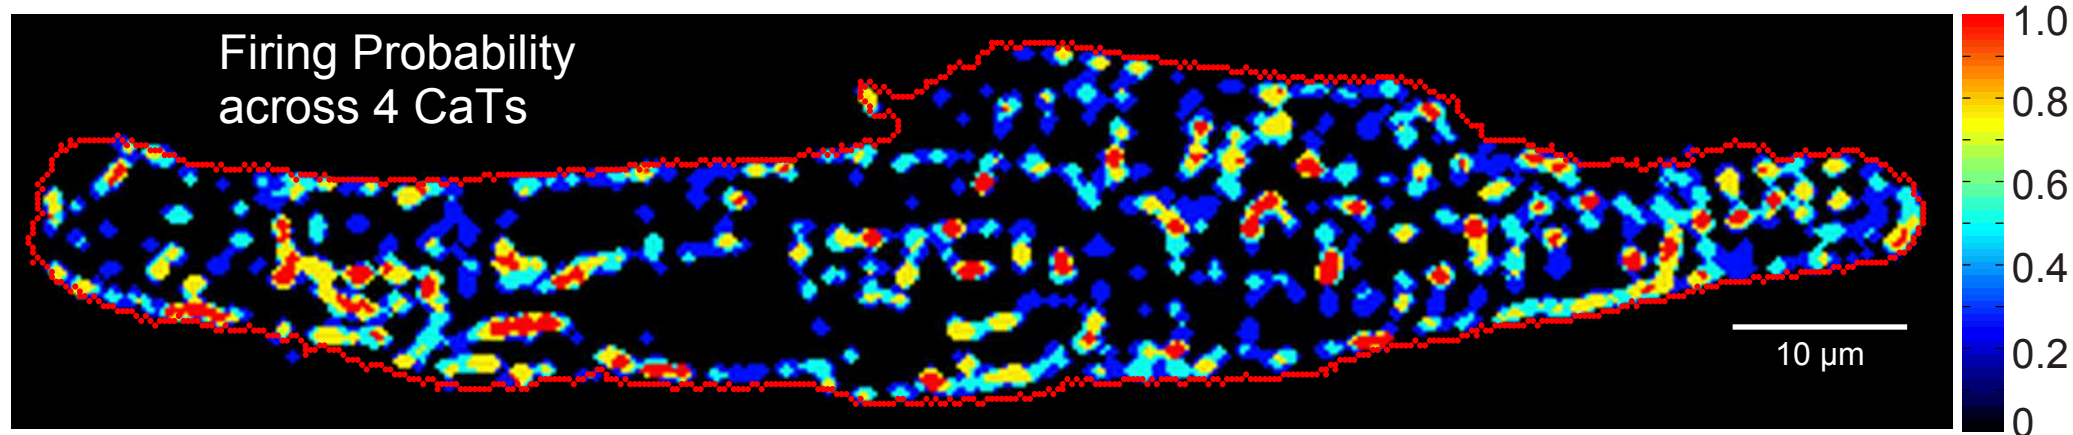

Supplement: supp [file elife-30425-supp-v1.zip]

## CaCLEAN couplon maps (raw)

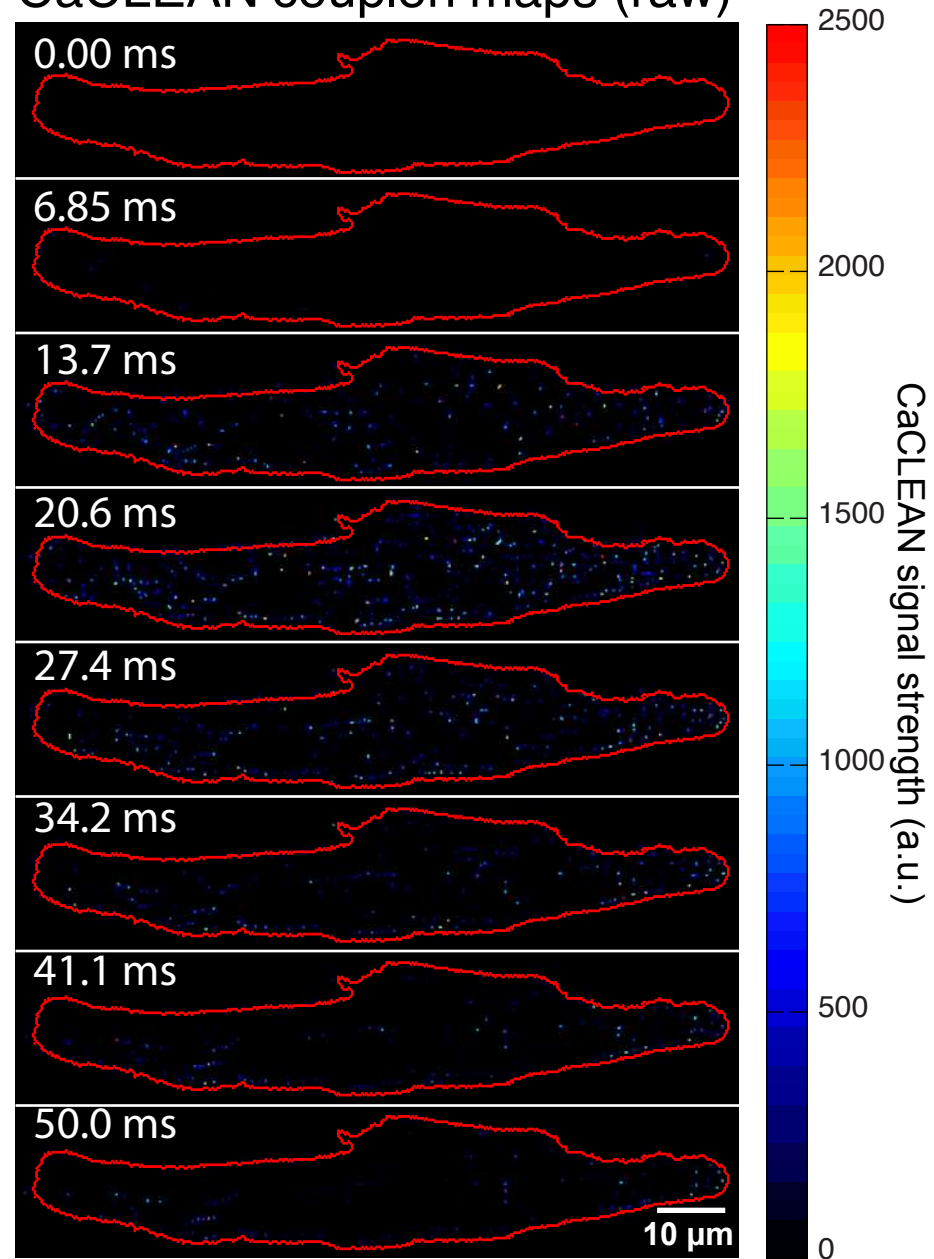

Supplement: supp [file elife-30425-supp-v1.zip]

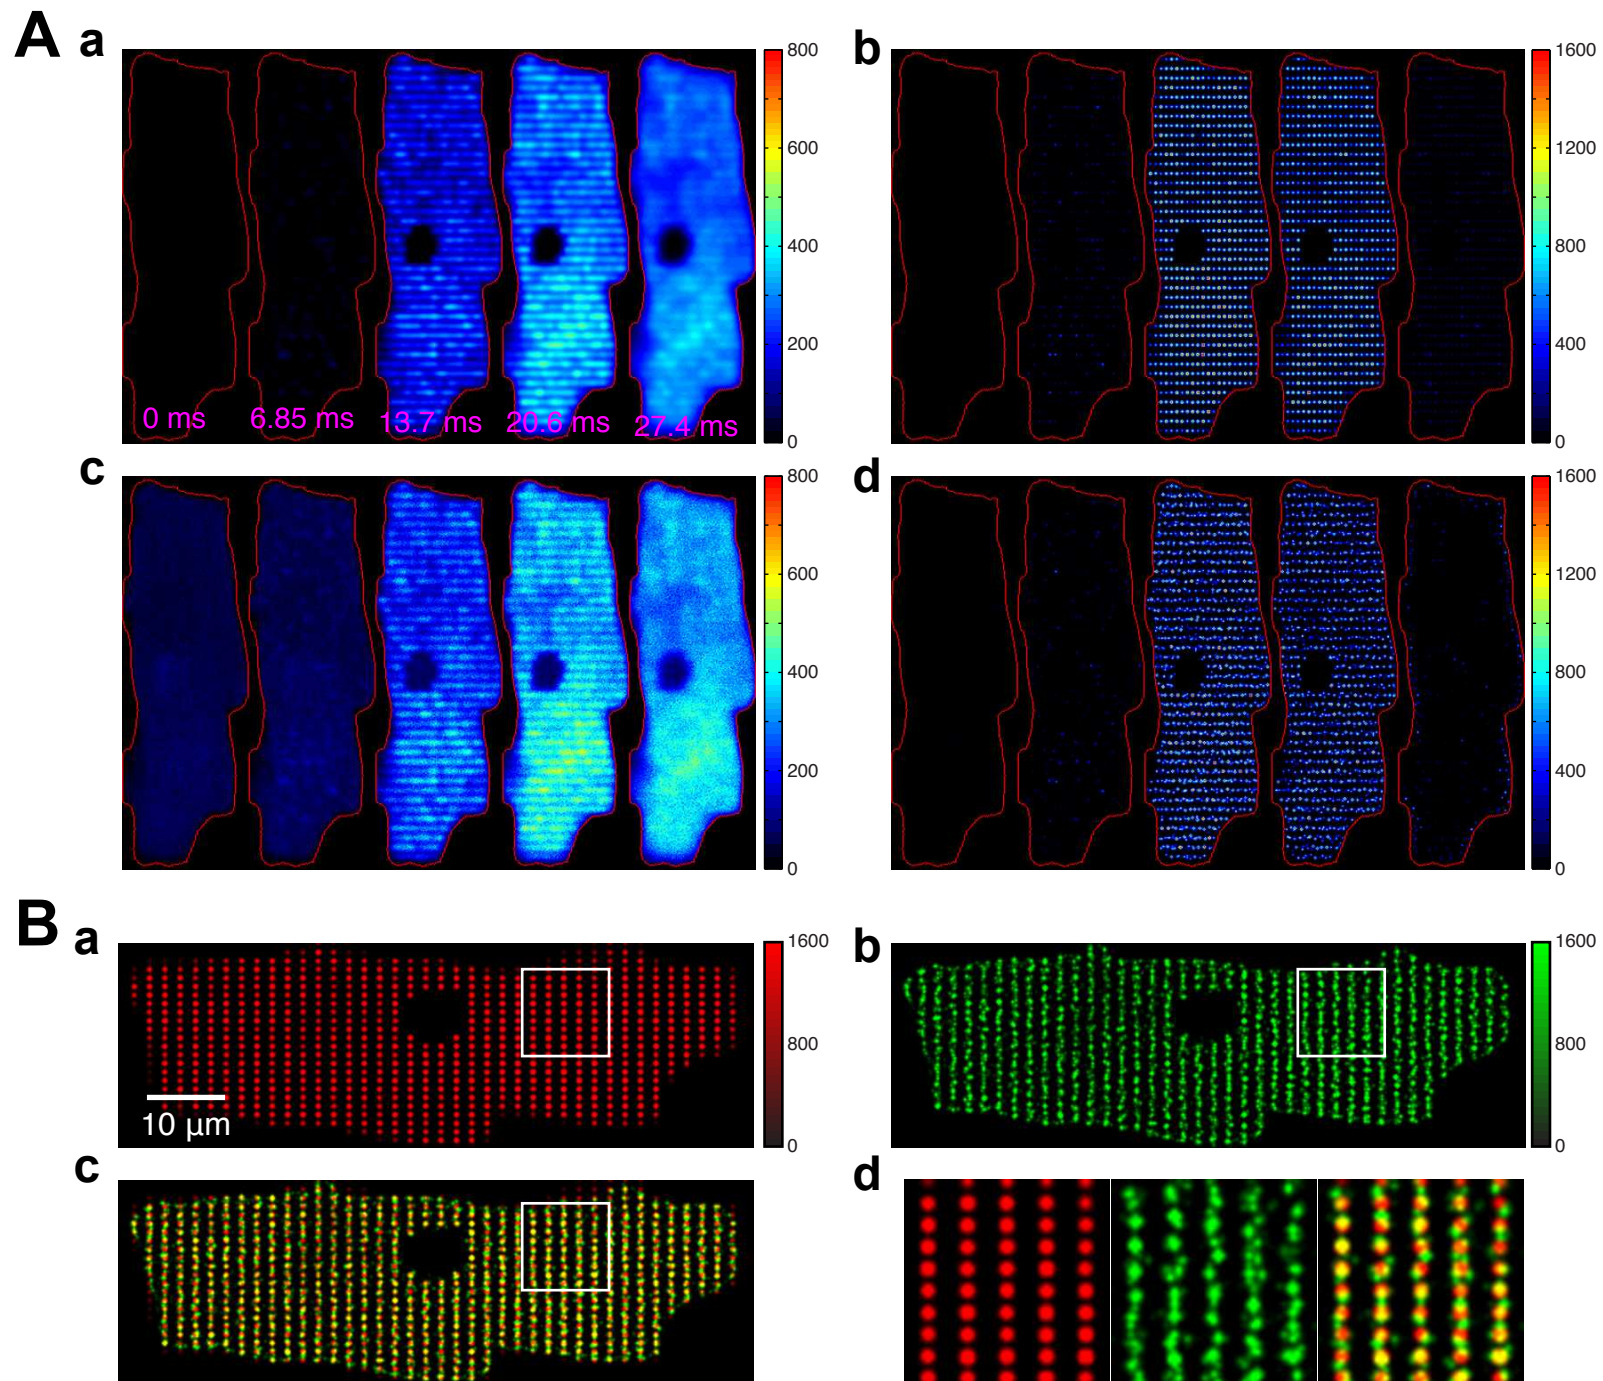

Supplement: supp [file elife-30425-supp-v1.zip]

**A**

## FFT Analysis of CaCLEAN Signal

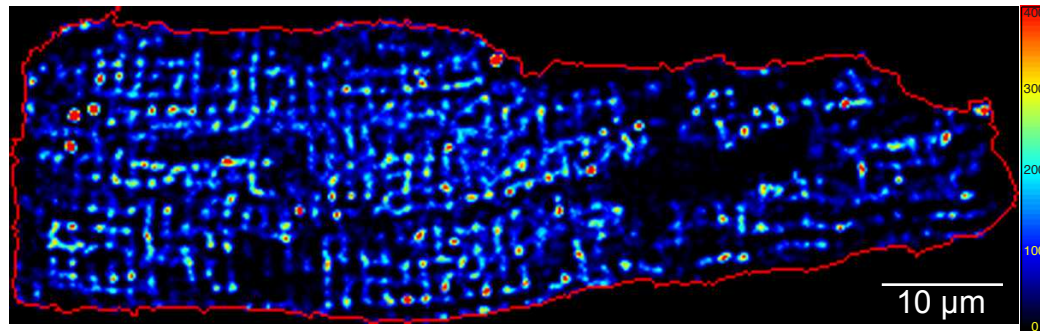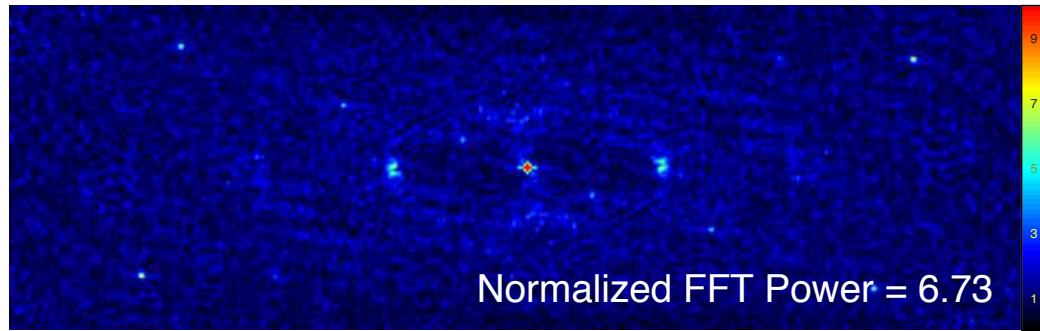**B**

## FFT Analysis of RyR-immunostaining

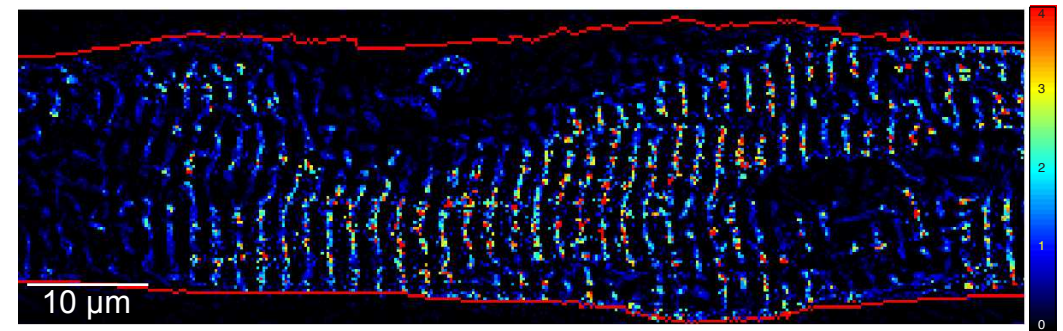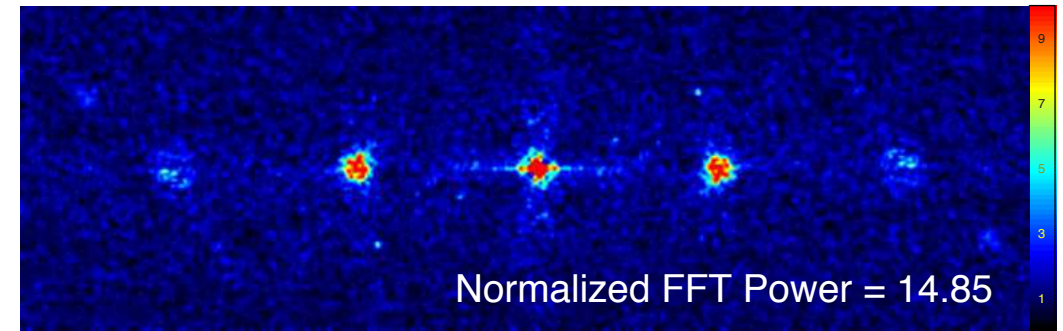**C**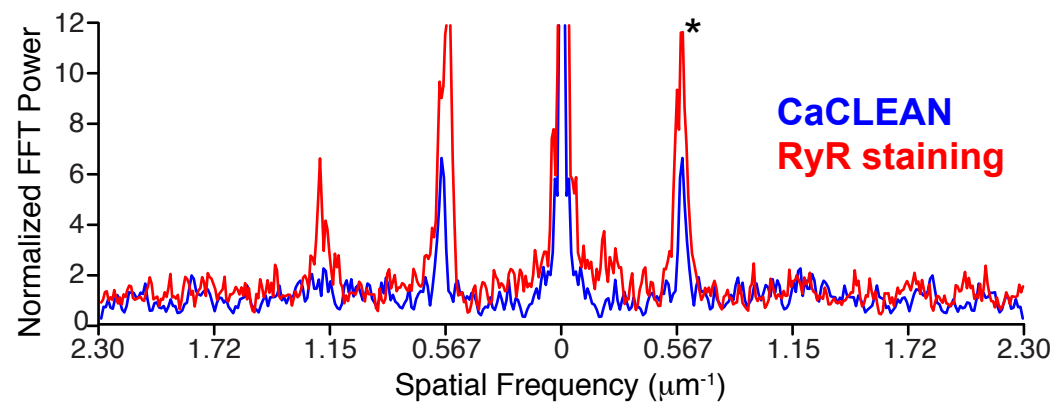**D**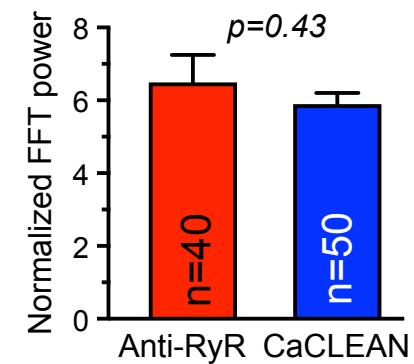

Supplement: supp [file elife-30425-supp-v1.zip]

**A****CaCLEAN Signal, Control**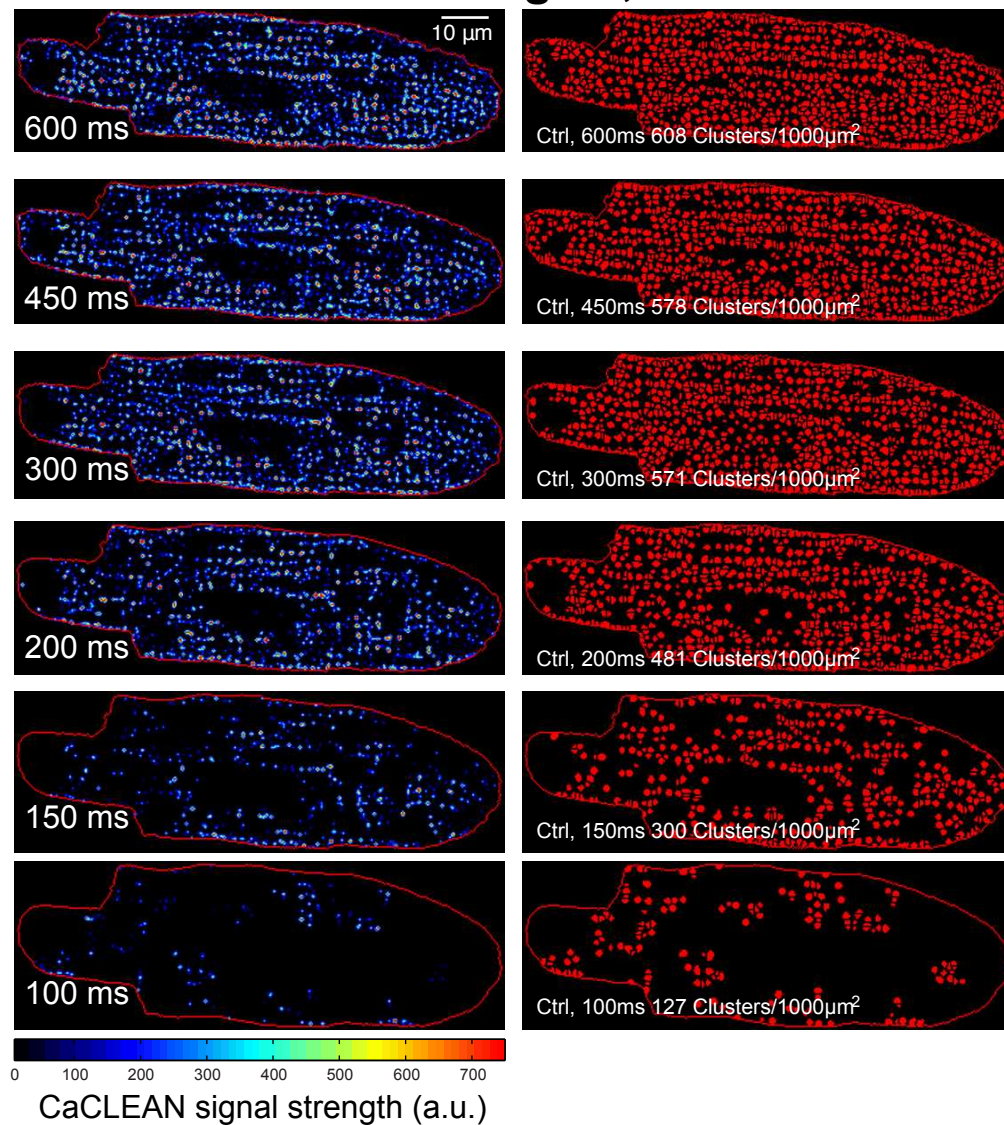**B****CaCLEAN Signal, Iso 10 nM**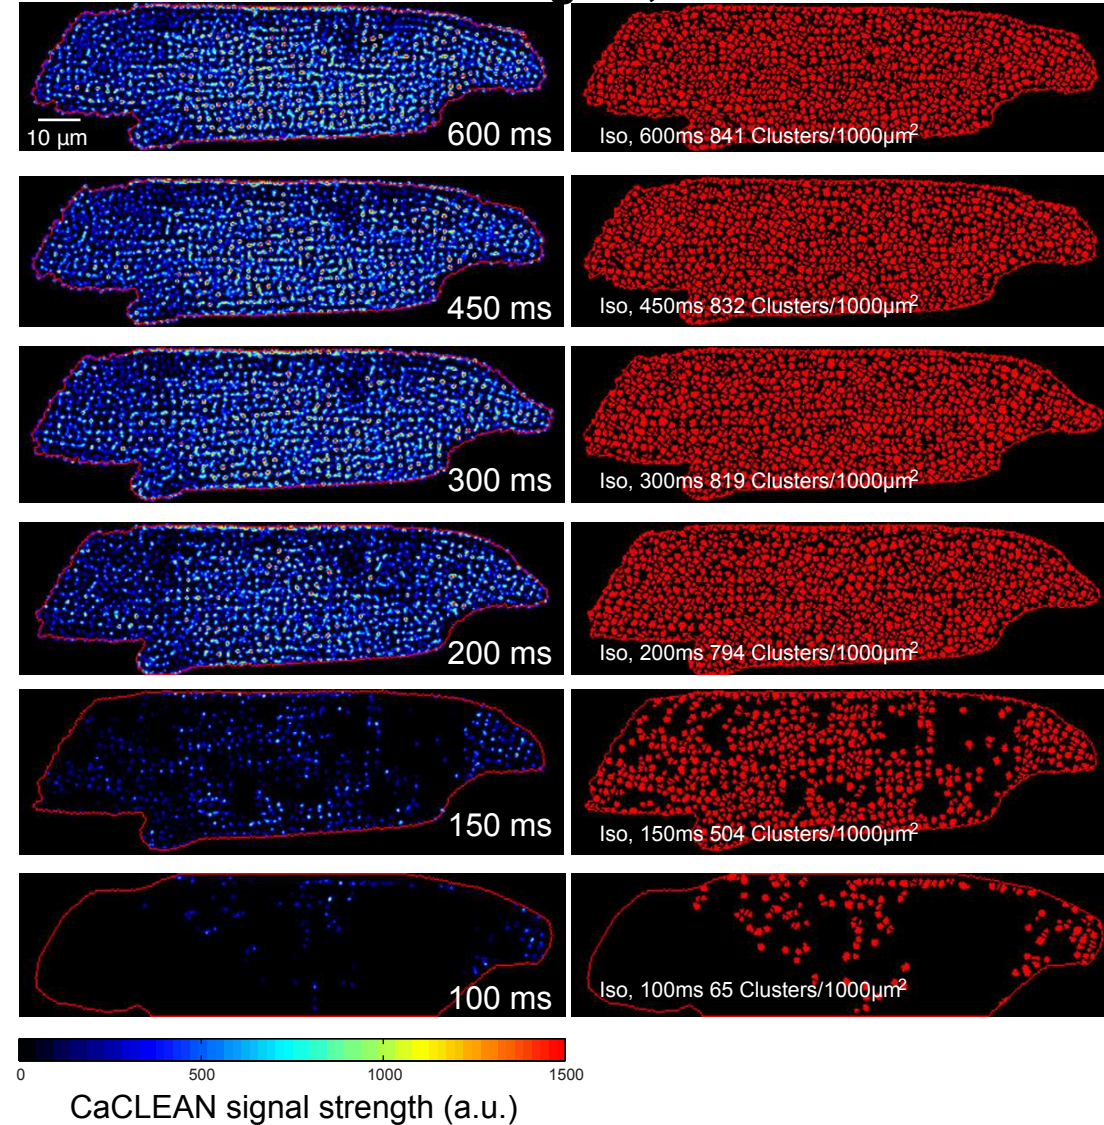

Supplement: supp [file elife-30425-supp-v1.zip]

**A**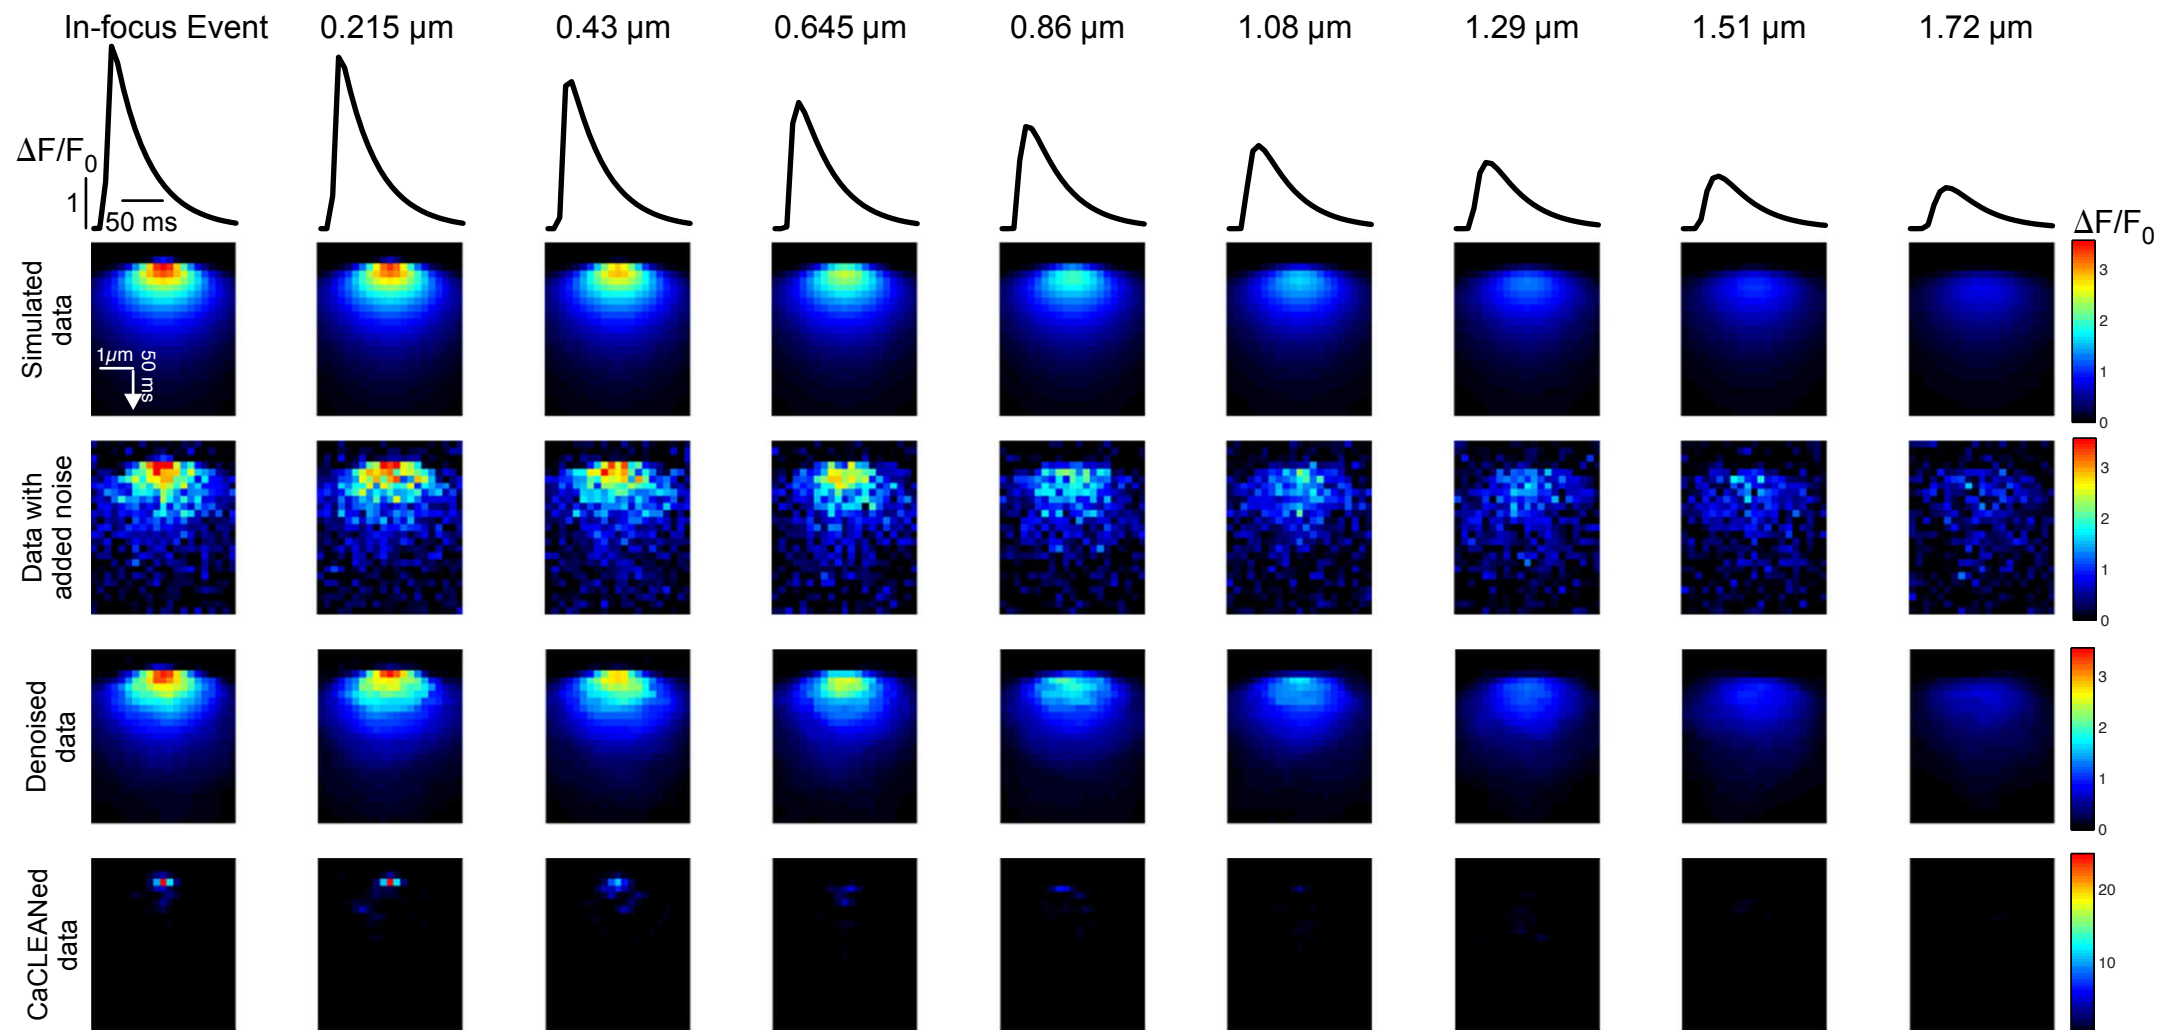**C**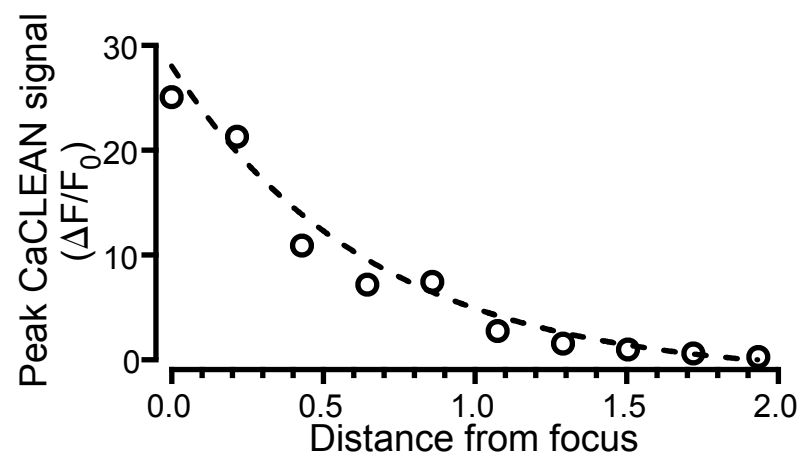

Supplement: supp [file elife-30425-supp-v1.zip]

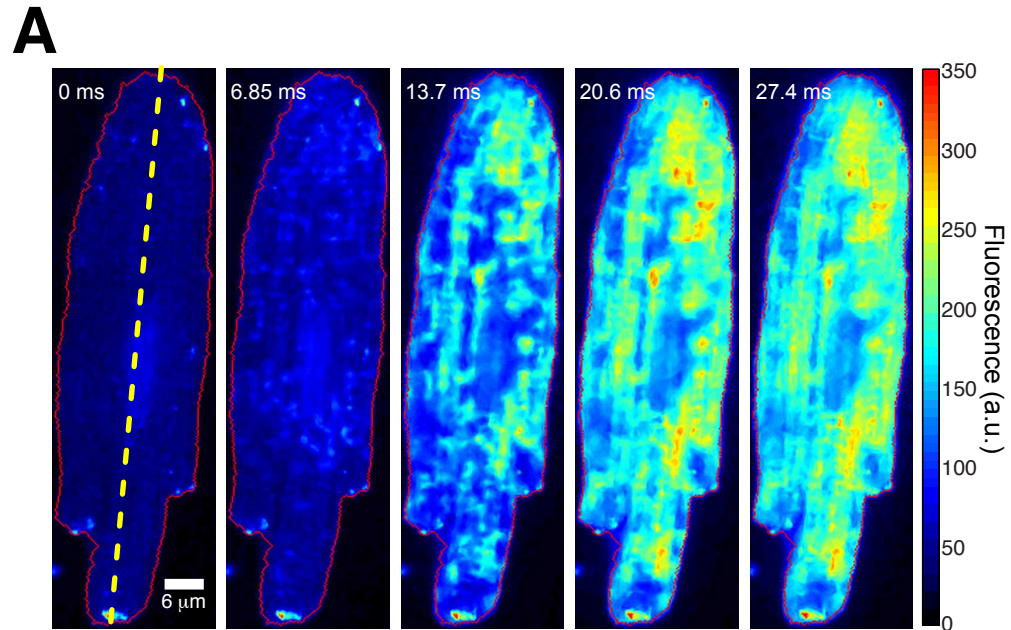

**B**

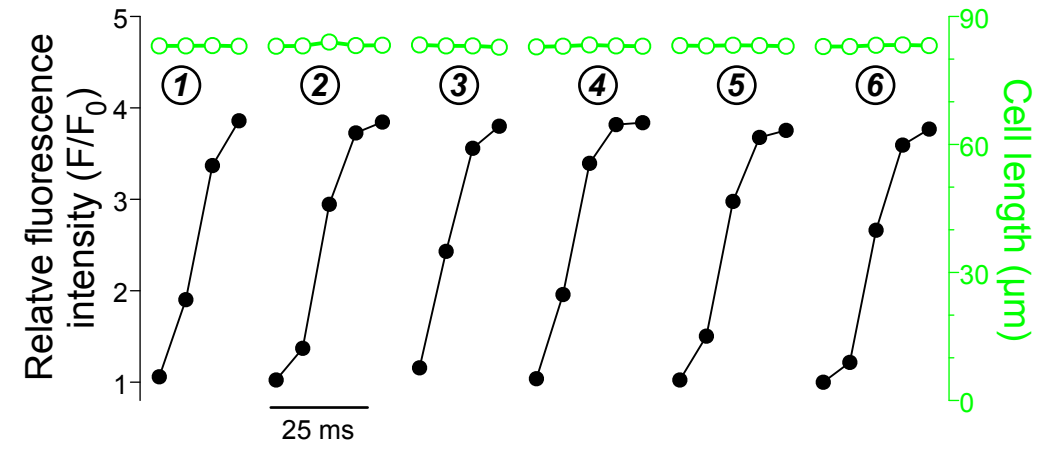

**C**

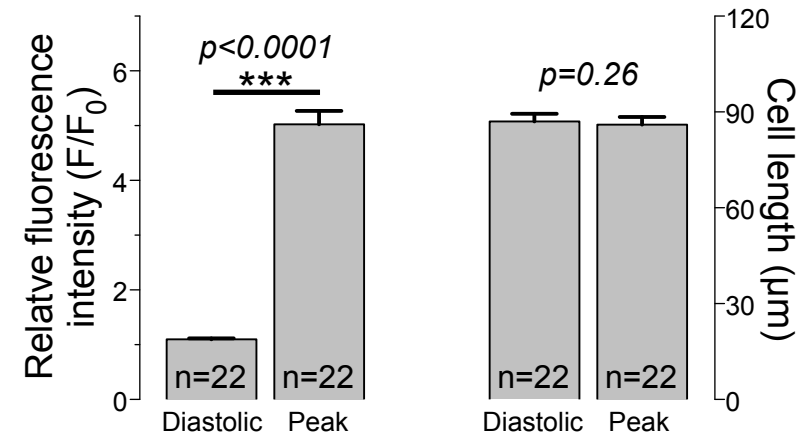

Supplement: supp [file elife-30425-supp-v1.zip]
